# Supplementary material
Source: PubMed Central journal article supplement (PMC3736312)

# Low Avidity CMV<sup>+</sup> T Cells accumulate in Old Humans

## Supplementary Figure 1

A)

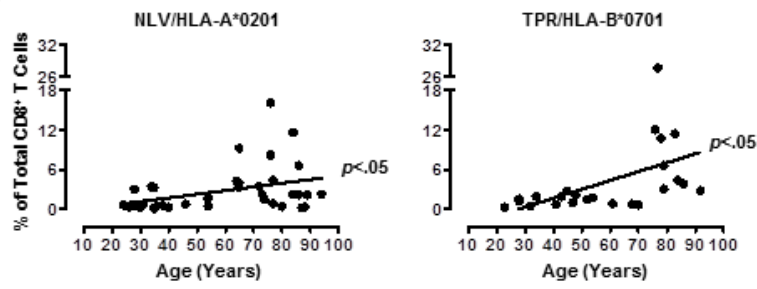

B)

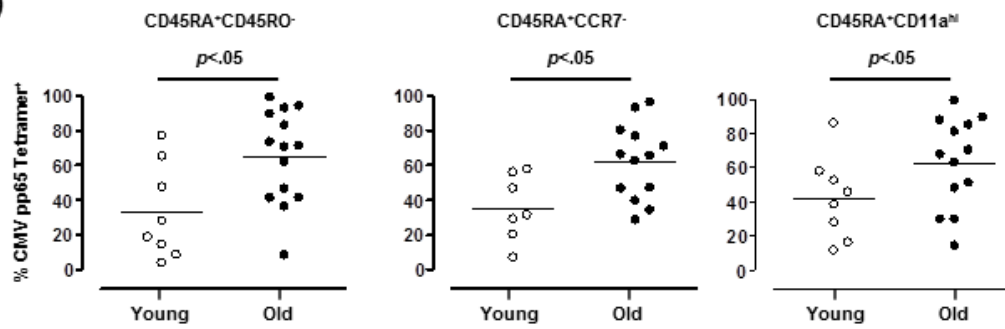

Supplementary Figure 2

A)

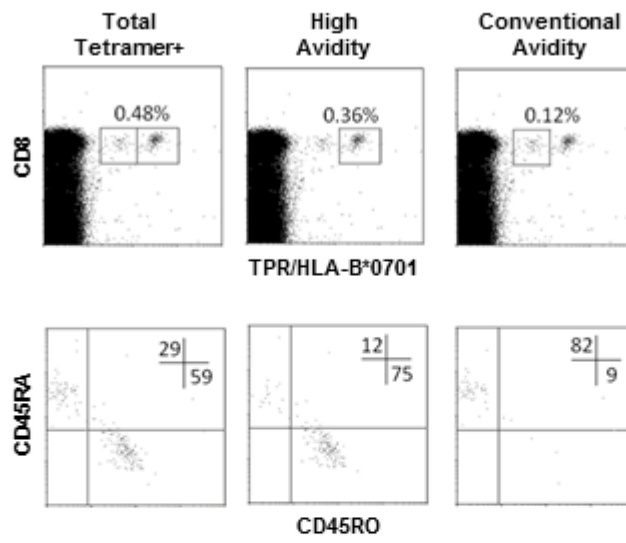

B)

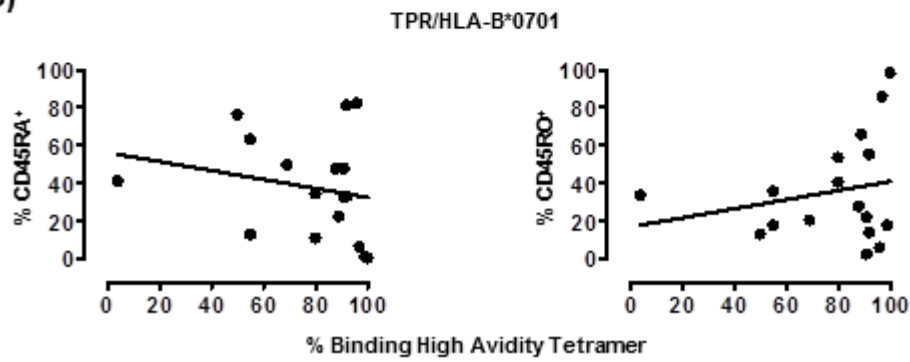

Low Avidity CMV<sup>+</sup> T Cells accumulate in Old Humans

Supplementary Figure 3

A)

Participants with mixed high and conventional avidity populations:

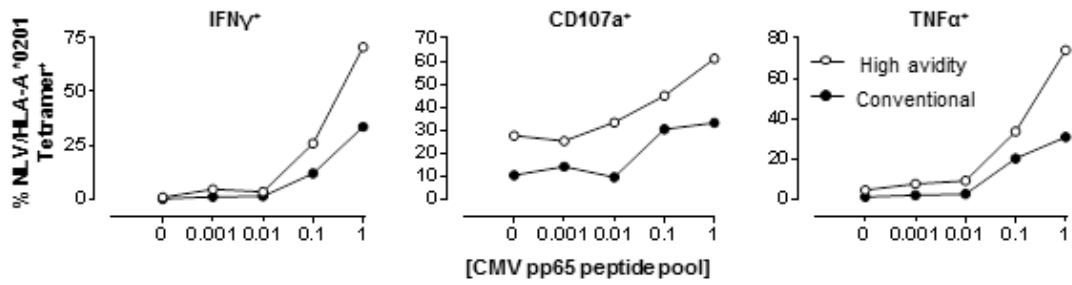

B)

Participants with all high avidity binding populations:

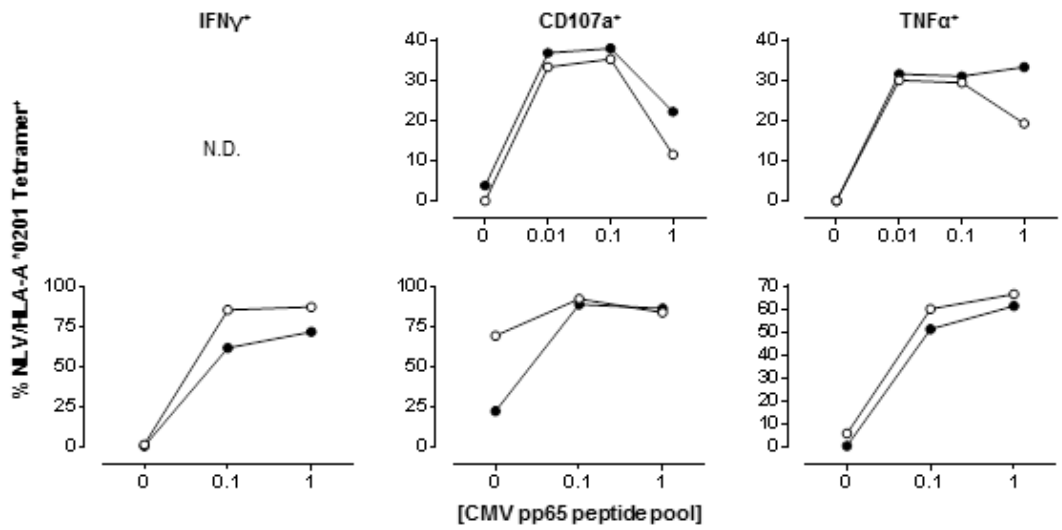

C)

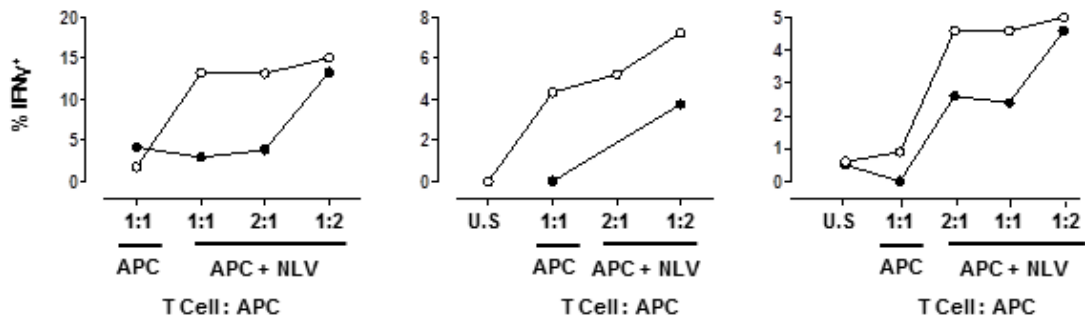

D)

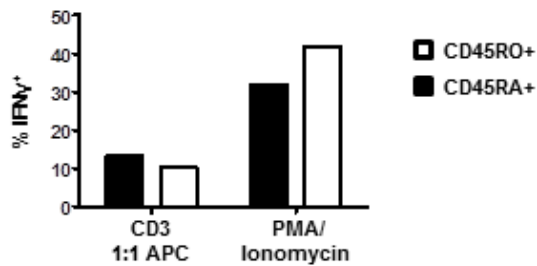

Low Avidity CMV<sup>+</sup> T Cells accumulate in Old Humans

**Supplementary Figure 4**

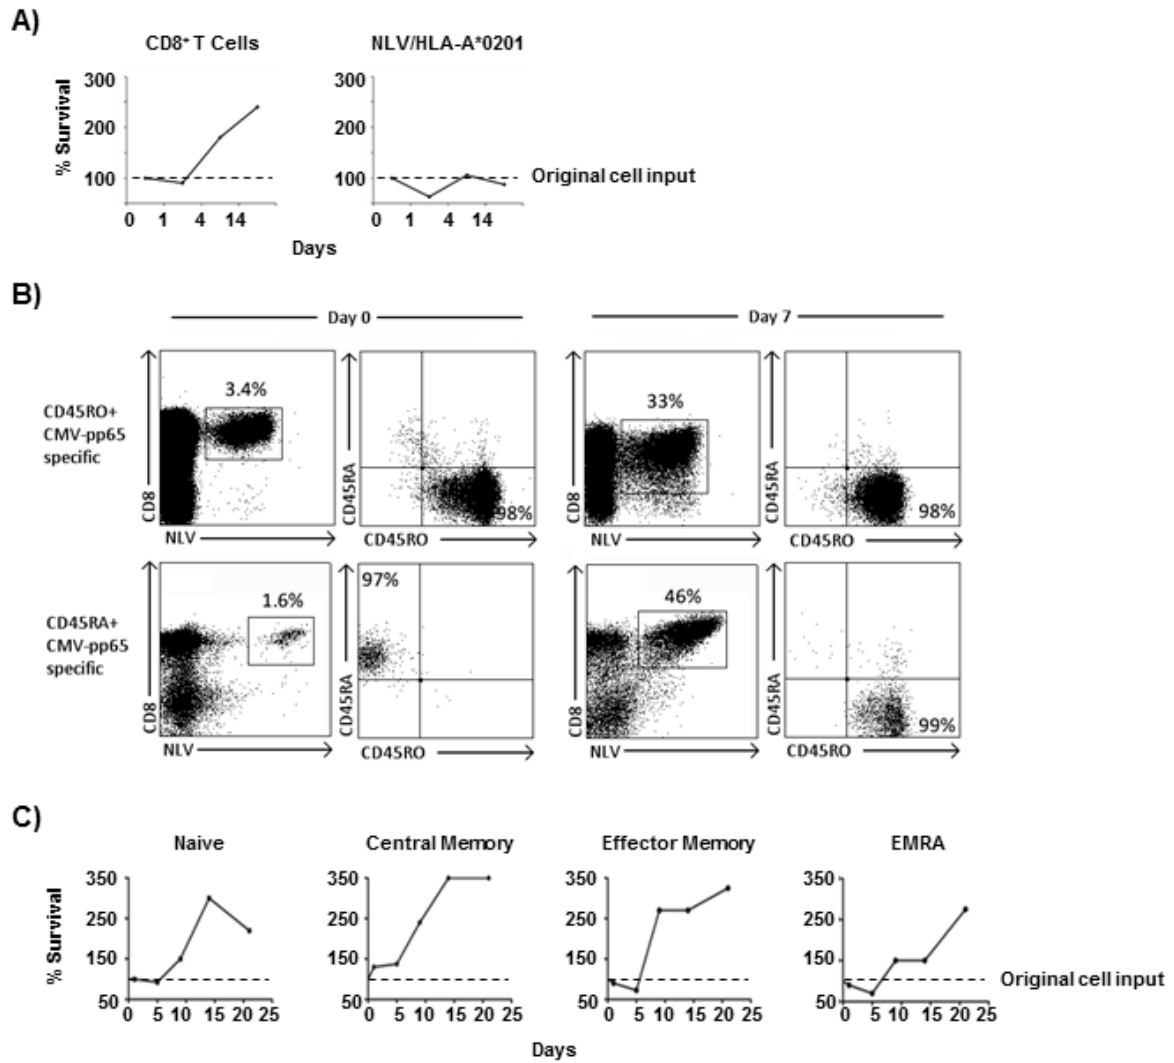

Supplement: NIHMS52837-supplement-1.pdf [file NIHMS52837-supplement-1.pdf]
